# Supplementary material for: Potential role of cellular miRNAs in coronavirus-host interplay
Source: PubMed Central journal article supplement (PMC7497610; doi:10.7717/peerj.9994), 2020-09-14

**A**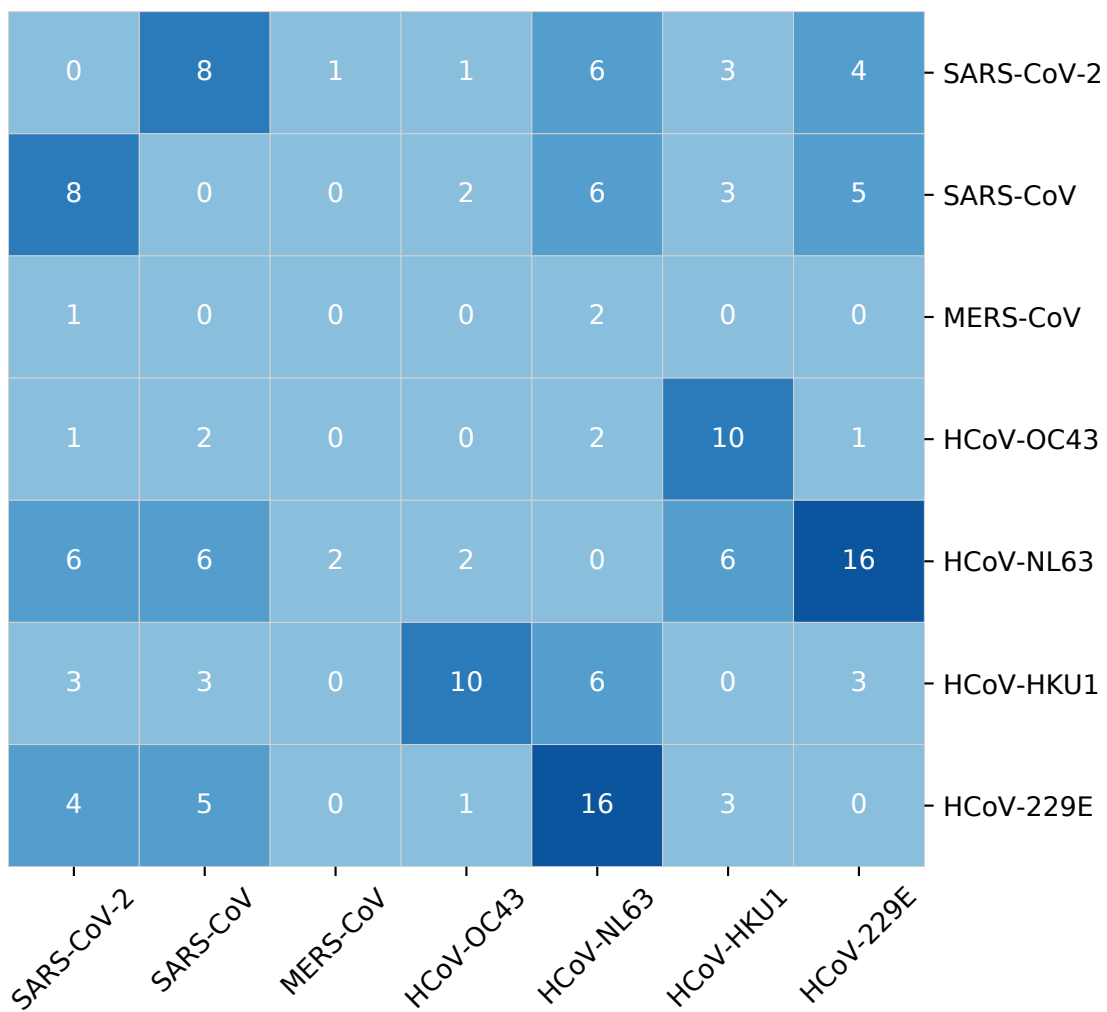**B**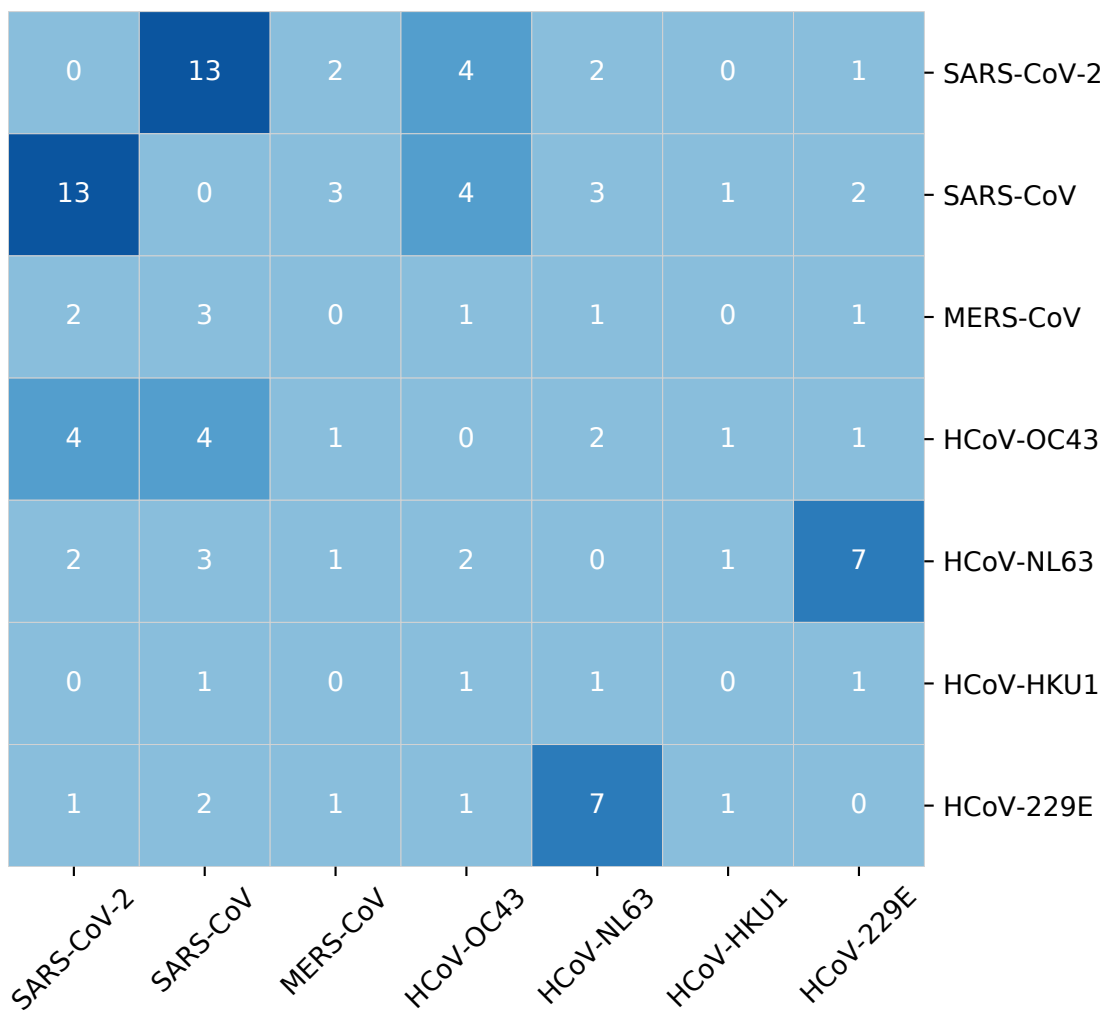**C**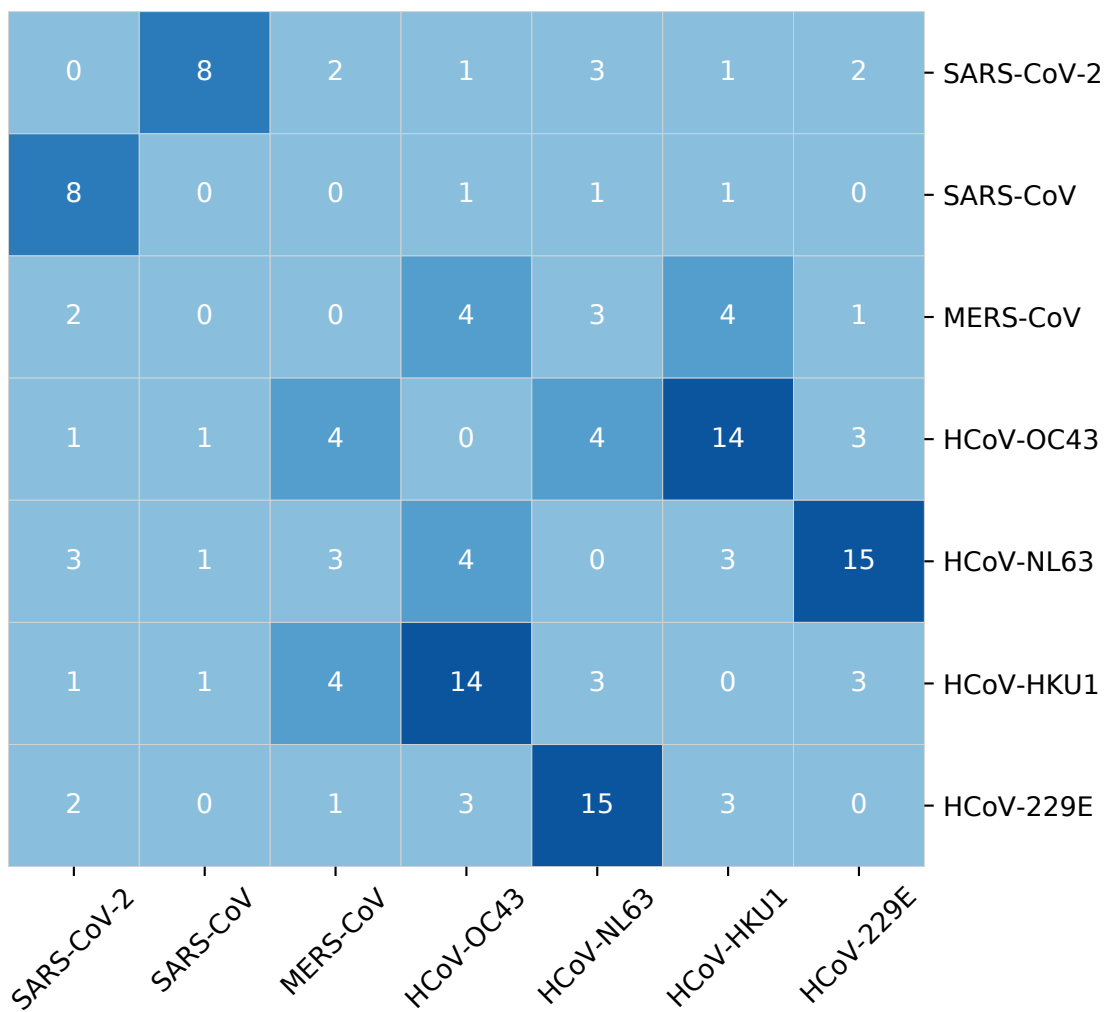**D**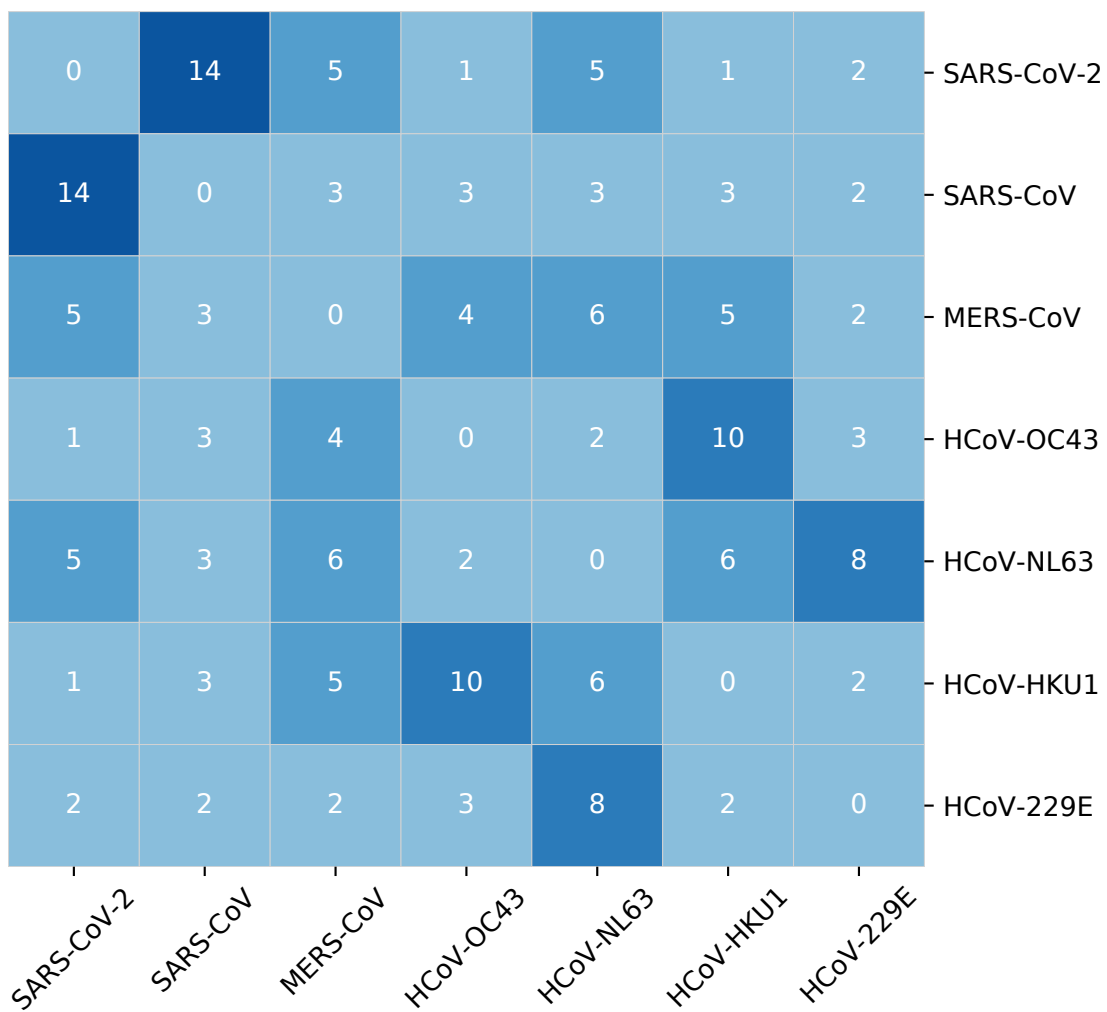

Supplement: peerj-08-9994-s001.pdf [file peerj-08-9994-s001.pdf]
