# Supplementary material for: Potential role of cellular miRNAs in coronavirus-host interplay
Source: PeerJ. 2020 Sep 14;8:e9994. doi: 10.7717/peerj.9994 (PMC7497610; doi:10.7717/peerj.9994)
Supplement: Supplemental Information 3 — Values in cells of the table refer to miRDB target scores. [file peerj-08-9994-s003.xlsx]

## Sheet: Best miRNA target scores
miRNA	HCoV-229E	HCoV-HKU1	HCoV-NL63	HCoV-OC43	MERS-CoV	SARS-CoV	SARS-CoV-2
hsa-miR-1305	88	83	97	88	91	84	91
hsa-miR-16-5p	96	83	95	96	96	100	99
hsa-miR-195-5p	97	83	95	96	96	100	99
hsa-miR-21-3p	100	100	100	99	78	92	98
hsa-miR-302b-5p	82	98	97	93	83	79	76
hsa-miR-302c-5p	99	99	100	99	96	92	97
hsa-miR-302d-5p	82	98	97	92	83	77	76
hsa-miR-3065-5p	99	100	100	99	92	78	89
hsa-miR-421	88	90	98	75	89	82	80
hsa-miR-424-5p	94	78	94	93	94	99	98
hsa-miR-4282	88	100	98	97	78	94	87
hsa-miR-4310	86	98	96	94	89	94	92
hsa-miR-497-5p	94	78	94	92	94	99	98
hsa-miR-548aj-5p	93	81	87	85	89	76	83
hsa-miR-548f-5p	93	84	87	85	85	77	81
hsa-miR-548g-5p	93	81	87	85	89	76	83
hsa-miR-548p	99	97	85	97	87	88	89
hsa-miR-548x-5p	93	81	87	85	89	76	83
hsa-miR-7159-5p	94	96	100	91	94	82	92
