# Supplementary material for: Potential role of cellular miRNAs in coronavirus-host interplay
Source: PeerJ. 2020 Sep 14;8:e9994. doi: 10.7717/peerj.9994 (PMC7497610; doi:10.7717/peerj.9994)
Supplement: Supplemental Information 4 [file peerj-08-9994-s004.xlsx]

## Sheet: KEGG pathways
KEGG pathway	p-value	Number of genes	Number of miRNAs
Proteoglycans in cancer	2.87128e-11	89	6
Prion diseases	1.51732e-08	11	5
Viral carcinogenesis	1.76384e-08	89	6
Adherens junction	6.47962e-08	39	6
Protein processing in endoplasmic reticulum	1.26608e-06	83	6
Fatty acid biosynthesis	1.40827e-06	4	5
Ubiquitin mediated proteolysis	2.89845e-06	67	6
Hepatitis B	1.65508e-05	61	6
Prostate cancer	3.55334e-05	46	6
p53 signaling pathway	6.12585e-05	38	6
Renal cell carcinoma	7.93789e-05	35	6
Cell cycle	9.89292e-05	57	6
TGF-beta signaling pathway	9.89292e-05	35	6
Glycosaminoglycan biosynthesis - chondroitin sulfate / dermatan sulfate	0.000195243	10	4
Bladder cancer	0.000230747	24	5
Fatty acid elongation	0.000474159	8	4
Pathways in cancer	0.000880953	150	6
Glioma	0.00126202	30	6
Thyroid cancer	0.00142139	16	5
Chronic myeloid leukemia	0.00142139	34	6
Oocyte meiosis	0.00200571	45	6
Fatty acid metabolism	0.0032948	16	5
Epstein-Barr virus infection	0.0032948	84	6
Endometrial cancer	0.00368176	25	6
Glycosaminoglycan biosynthesis - heparan sulfate / heparin	0.00433758	10	5
Pancreatic cancer	0.00488341	32	6
Vitamin B6 metabolism	0.00508297	4	4
RNA transport	0.00508297	68	6
Shigellosis	0.00508297	31	6
Colorectal cancer	0.00508297	29	6
Hippo signaling pathway	0.00564206	53	6
Dorso-ventral axis formation	0.00918533	16	5
Spliceosome	0.00918533	53	6
Bacterial invasion of epithelial cells	0.0108724	32	6
Small cell lung cancer	0.0112294	38	6
Melanoma	0.0139349	29	6
Neurotrophin signaling pathway	0.0160735	51	6
FoxO signaling pathway	0.0184904	54	6
Hepatitis C	0.0200101	55	6
Ribosome	0.0230532	55	6
Biotin metabolism	0.0242882	1	1
Signaling pathways regulating pluripotency of stem cells	0.0270868	54	6
TNF signaling pathway	0.0270868	48	6
Lysine degradation	0.0336495	21	6
Ribosome biogenesis in eukaryotes	0.0336495	37	6
mTOR signaling pathway	0.0336495	27	6
AMPK signaling pathway	0.0336495	51	6
Glycosaminoglycan biosynthesis - keratan sulfate	0.03602	6	4
Influenza A	0.03602	67	6
2-Oxocarboxylic acid metabolism	0.0393198	7	4
Acute myeloid leukemia	0.0393198	26	6
Circadian rhythm	0.0418056	15	6
Insulin signaling pathway	0.0418056	55	6
N-Glycan biosynthesis	0.0431751	21	6
