# Supplementary material for: Potential role of cellular miRNAs in coronavirus-host interplay
Source: PeerJ. 2020 Sep 14;8:e9994. doi: 10.7717/peerj.9994 (PMC7497610; doi:10.7717/peerj.9994)
Supplement: Supplemental Information 5 — Seed region binding types are named according to TargetScan. [file peerj-08-9994-s005.xlsx]

## Sheet: hsa-miR-21-3p
Virus	6mer	7mer-1a	7mer-m8	8mer-1a	Total	Without mutations	Mean of average mutation rates
SARS-CoV-2	13	3	17	2	35	27	8.64678e-05
SARS-CoV	9	4	8	3	24	17	0.00110787
MERS-CoV	8	1	7	1	17	11	0.00122057
HCoV-OC43	9	3	13	7	32	20	0.00894029
HCoV-NL63	21	7	24	12	64	55	0.00359848
HCoV-HKU1	12	7	14	8	41	34	0.00882695
HCoV-229E	10	4	18	11	43	36	0.0114517

## Sheet: hsa-miR-16-5p|195-5p|424-5p
Virus	6mer	7mer-1a	7mer-m8	8mer-1a	Total	Without mutations	Mean of average mutation rates
SARS-CoV-2	11	1	8	7	27	16	0.000304239
SARS-CoV	7	5	12	9	33	23	0.000628857
MERS-CoV	5	0	8	6	19	14	0.000281829
HCoV-OC43	3	1	4	6	14	11	0.000281215
HCoV-NL63	2	2	6	4	14	12	0.0004329
HCoV-HKU1	3	3	3	3	12	7	0.0154762
HCoV-229E	10	3	5	6	24	21	0.0094697

## Sheet: hsa-miR-3065-5p
Virus	6mer	7mer-1a	7mer-m8	8mer-1a	Total	Without mutations	Mean of average mutation rates
SARS-CoV-2	10	6	2	4	22	18	8.8433e-05
SARS-CoV	12	7	4	1	24	16	0.00102681
MERS-CoV	16	6	6	4	32	28	0.00135961
HCoV-OC43	17	6	10	7	40	29	0.00912073
HCoV-NL63	37	10	15	8	70	55	0.0105628
HCoV-HKU1	23	5	11	7	46	35	0.0192547
HCoV-229E	31	7	19	2	59	53	0.00770416

## Sheet: hsa-miR-421
Virus	6mer	7mer-1a	7mer-m8	8mer-1a	Total	Without mutations	Mean of average mutation rates
SARS-CoV-2	18	6	2	3	29	24	5.21788e-05
SARS-CoV	20	3	3	4	30	27	0.000108085
MERS-CoV	21	6	5	4	36	28	0.000948237
HCoV-OC43	23	4	9	0	36	25	0.0146909
HCoV-NL63	34	16	9	1	60	49	0.0167677
HCoV-HKU1	27	9	3	1	40	31	0.00857143
HCoV-229E	25	11	7	1	44	43	0.00258264
