# Supplementary material for: Potential role of cellular miRNAs in coronavirus-host interplay
Source: PeerJ. 2020 Sep 14;8:e9994. doi: 10.7717/peerj.9994 (PMC7497610; doi:10.7717/peerj.9994)
Supplement: Supplemental Information 8 [file peerj-08-9994-s008.xlsx]

## Sheet: Differential expression GSE3697
pre-miRNA.miRNA	Mean (control)	Log2(fold change)	p-value	Adjusted p-value
mmu-mir-132.mmu-miR-132-3p	487.561	0.853605	0.000503397	0.0229885
mmu-mir-147.mmu-miR-147-5p	16.3134	3.5265	6.99835e-06	0.000575265
mmu-mir-147.mmu-miR-147-3p	30.4563	3.00516	1.28467e-06	0.000144102
mmu-mir-155.mmu-miR-155-5p	569.075	1.09795	3.20524e-05	0.00219559
mmu-mir-21a.mmu-miR-21a-5p	575512	1.46961	1.40247e-11	3.84276e-09
mmu-mir-21a.mmu-miR-21a-3p	814.456	3.05227	4.69376e-38	3.85827e-35
mmu-mir-223.mmu-miR-223-5p	80.6467	2.68724	3.23705e-11	6.65213e-09
mmu-mir-223.mmu-miR-223-3p	2972.52	1.77198	7.37708e-12	3.03198e-09
mmu-mir-23a.mmu-miR-23a-5p	20.3131	2.91052	3.77457e-06	0.000344745
mmu-mir-27a.mmu-miR-27a-5p	691.348	1.13424	7.13024e-07	9.76843e-05
mmu-mir-340.mmu-miR-340-5p	2396.47	0.884839	4.10434e-05	0.00259521
mmu-mir-449c.mmu-miR-449c-5p	204.118	-2.35283	1.40246e-06	0.000144102
mmu-mir-5099.mmu-miR-5099	701.805	1.1872	0.000315532	0.0152569
mmu-mir-6236.mmu-miR-6236	115.004	-1.50904	7.21216e-05	0.00423457
mmu-mir-6238.mmu-miR-6238	224.882	-1.35134	1.243e-05	0.000928863
mmu-mir-6240.mmu-miR-6240	1217.44	-1.47808	3.91303e-10	6.43302e-08
mmu-mir-6538.mmu-miR-6538	104.496	-1.56033	0.00026783	0.0137597
mmu-mir-709.mmu-miR-709	11.5997	2.91325	0.000872477	0.0377461
mmu-mir-92a-1.mmu-miR-92a-1-5p	77.6738	1.30729	0.000249896	0.0136943

## Sheet: Differential expression GSE9062
pre-miRNA.miRNA	Mean (control)	Log2(fold change)	p-value	Adjusted p-value
mmu-mir-1194.mmu-miR-1194	6.52451	3.53911	0.000684037	0.0336546
mmu-mir-145b.mmu-miR-145b	20.0536	2.59504	5.84321e-05	0.00460961
mmu-mir-147.mmu-miR-147-3p	9.75705	2.59322	0.000992687	0.0465145
mmu-mir-149.mmu-miR-149-3p	16.7231	2.61803	0.000112181	0.00788472
mmu-mir-21a.mmu-miR-21a-5p	71363.1	1.67748	1.78841e-05	0.0017598
mmu-mir-21a.mmu-miR-21a-3p	437.918	3.45865	1.17292e-13	5.77079e-11
mmu-mir-223.mmu-miR-223-5p	270.124	2.58063	2.25948e-08	6.62654e-06
mmu-mir-296.mmu-miR-296-3p	38.914	2.20895	6.08994e-05	0.00460961
mmu-mir-3473b.mmu-miR-3473b	547.413	1.78168	0.000171128	0.011226
mmu-mir-3473e.mmu-miR-3473e	384.057	1.86731	0.000200203	0.0123125
mmu-mir-3474.mmu-miR-3474	87.5752	-1.57304	0.000597695	0.0309543
mmu-mir-351.mmu-miR-351-3p	503.155	-2.54382	1.00257e-07	1.97305e-05
mmu-mir-449a.mmu-miR-449a-5p	2196.22	1.66803	6.70708e-06	0.000733307
mmu-mir-449a.mmu-miR-449a-3p	14.0454	4.88097	2.03593e-07	3.33892e-05
mmu-mir-449c.mmu-miR-449c-5p	1361.67	3.92818	3.97178e-14	3.90823e-11
mmu-mir-499.mmu-miR-499-5p	488.345	2.92312	3.06419e-06	0.000376895
mmu-mir-5099.mmu-miR-5099	379.195	2.29875	8.08911e-07	0.00011371
mmu-mir-5128.mmu-miR-5128	97.6076	1.80555	4.72622e-05	0.00422782
mmu-mir-6978.mmu-miR-6978-5p	16.9852	4.84648	2.69372e-08	6.62654e-06
mmu-mir-7a-1.mmu-miR-7a-5p	213.482	1.41438	0.000268175	0.0146603
mmu-mir-7a-2.mmu-miR-7a-5p	211.894	1.41934	0.000254801	0.0146603
